# Supplementary material
Source: Springer Nature journal article supplement (https://www.springermedizin.de/resource/supplementary/12978_2012_222_MOESM3_ESM.pdf/9602278)

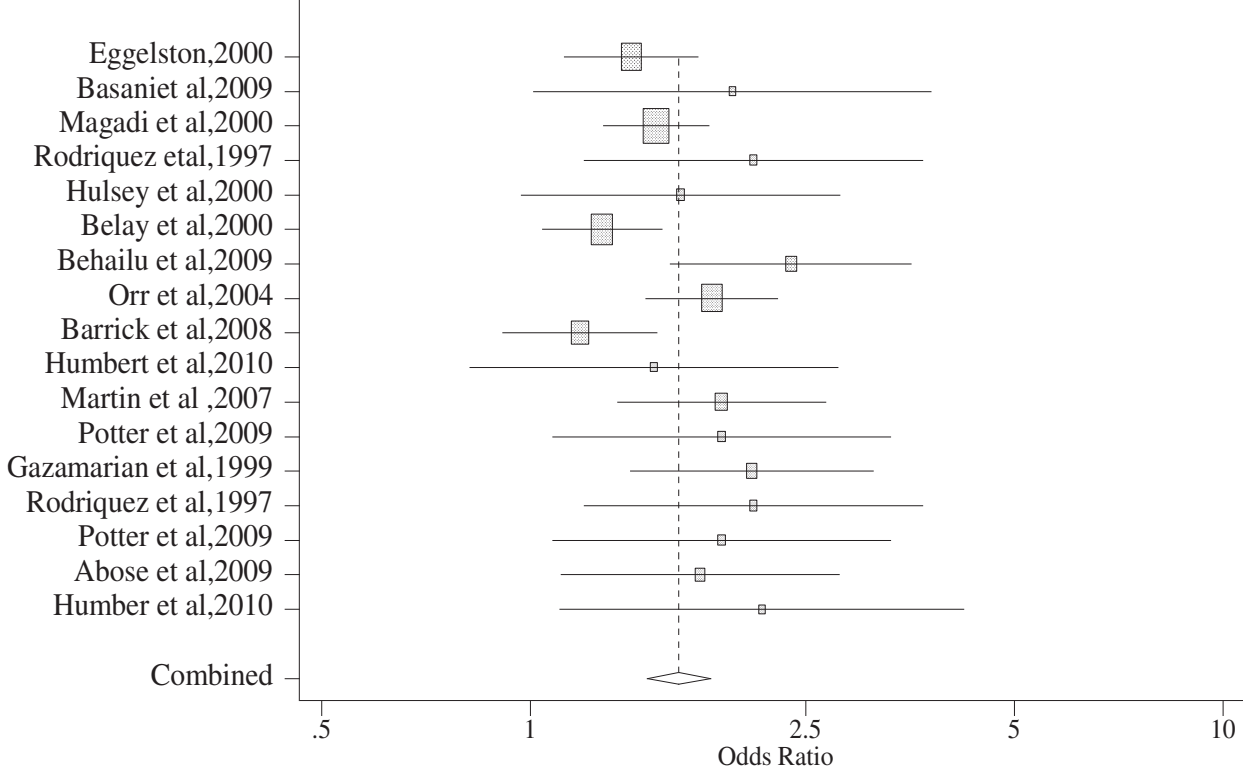

Supplement: MOESM3 [file 9602278]
